# Supplementary material for: Heterointerface enhanced NiFe LDH/V–Co4N electrocatalysts for the oxygen evolution reaction
Source: Royal Society of Chemistry journal article supplement (doi:10.1039/d2ta04120k), 2022-01-01
Supplement: d2ta04120k1.pdf [file d2ta04120k1.pdf]

## Electronic Supplementary Information

### **Heterointerface enhanced NiFe LDH/V-Co<sub>4</sub>N electrocatalysts for oxygen evolution reaction**

Shuya Zhang,<sup>†a</sup> Lan Wang,<sup>†a</sup> Tianzhu Xie,<sup>a</sup> Qiming Chen,<sup>a</sup> Wenchao Peng,<sup>a</sup> Yang Li,<sup>a</sup> Fengbao Zhang<sup>a</sup> and Xiaobin Fan<sup>\*abc</sup>

<sup>a</sup> School of Chemical Engineering and Technology, State Key Laboratory of Chemical Engineering, Tianjin University, Tianjin, 300354, China.

<sup>b</sup> Haihe Laboratory of Sustainable Chemical Transformations, Tianjin 300192, China.

<sup>c</sup> Institute of Shaoxing, Tianjin University, Zhejiang 312300, China.

† These authors contributed equally.

\* Corresponding authors.

E-mail addresses: [xiaobinfan@tju.edu.cn](mailto:xiaobinfan@tju.edu.cn)

## Experimental Section

### Materials

Cobaltous nitrate hexahydrate [ $\text{Co}(\text{NO}_3)_2 \cdot 6\text{H}_2\text{O}$ , 99.99%, Aladdin], ammonium metavanadate [ $\text{NH}_4\text{VO}_3$ , 99.99%, Aladdin], ammonium fluoride ( $\text{NH}_4\text{F}$ , AR, Aladdin) and urea [ $\text{CO}(\text{NH}_2)_2$ , AR, Macklin]. Nickel nitrate hexahydrate [ $\text{Ni}(\text{NO}_3)_2 \cdot 6\text{H}_2\text{O}$ , AR, Aladdin] and ferrous sulfate ( $\text{FeSO}_4 \cdot 7\text{H}_2\text{O}$ , AR, Heowns). Nickel foam (NF). Ethanol is provided by Aladdin Chemical Co., China. All the chemicals were used without further purification.

### Synthesis of NiFe LDH/Co<sub>4</sub>N@NF arrays

Co<sub>4</sub>N@NF sample was obtained via a similar process to V-Co<sub>4</sub>N@NF, except without the addition of the V source. NiFe LDH/Co<sub>4</sub>N@NF was obtained via a similar process to NiFe LDH/V-Co<sub>4</sub>N@NF, except replacing the substrate with Co<sub>4</sub>N@NF as the working electrode.

### Synthesis of NiFe LDH @NF arrays

NiFe LDH@NF was obtained by replacing the substrate with bare NF based on the above experimental parameters.

### Synthesis of NiFe LDH+V-Co<sub>4</sub>N@NF arrays

The suspension containing 2.8 mg NiFe LDH was dropped onto the V-Co<sub>4</sub>N@NF substrate and dried naturally.

### Materials characterization

The morphologies and elemental mappings of materials were characterized by scanning electron microscopy (SEM, S-4800, HITACHI) and transmission electron microscopy equipped with an energy-dispersive X-ray analyzer (JEOL JEM-2100, Japan). X-ray diffraction (XRD, D8-Focus, Bruker Axs) was utilized to characterize the phases composition of samples. X-ray photoelectron spectroscopy (XPS, ESCALAB 250 XI) was employed to reveal the electronic structure of the samples.

### Electrochemical measurement

All electrochemical tests for OER performance were performed on the electrochemical workstation (CHI760) in 1 M KOH solution. During the measurements, the three-electrode test system was adopted, where the prepared materials were used directly as working electrodes, and carbon rod and Ag/AgCl electrode were used as counter electrode and reference electrode, respectively. All potentials were converted into potentials related to RHE using the following equation,  $E(\text{RHE}) = E_{\text{Ag}/\text{AgCl}} + 0.197 + 0.059 \text{ pH}$ . Firstly, 50 cycles of cyclic voltammetry (CV) were carried out at the scan rate of  $50 \text{ mV s}^{-1}$  to make the catalyst stabilized. Then, anodic polarization curves were obtained by utilizing cyclic voltammetry (CV) at a scan rate of  $1 \text{ mV s}^{-1}$  and 90%  $iR$  compensation. Note that the reverse sweep data of the anodic polarization were selected for analysis to avoid the interference of the oxidation peaks.<sup>1</sup> Cyclic voltammetry (CV) curves were collected at different sweep rates in the potential range of 0.16-0.33V vs. RHE, which were used to calculate the double-layer capacitance and further estimate the electrochemically surface area (ECSA). The Nyquist plots were collected at the potential of 0.45 V vs RHE in the frequency range of 1000000 HZ-0.01 HZ. The durability was evaluated with chronoamperometry measurements to assess the electrochemical stability of the catalyst.

## Computational details

In this work, DFT calculations were performed by Vienna Ab initio Simulation Package (VASP) with the projector augmented wave (PAW) method. The exchange-related function utilized was Perdew-Burke-Ernzerhof (PBE). The cut-off energy specified by ENCUT was set to 500 eV for cell optimization and calculation of the electronic structure. The modeling was performed with a vacuum spacing of at least 15 Å in the direction of the vertical catalyst surface to prevent interference. Taking into account the large structural model, the Brillouin zone integration was performed using  $1 \times 1 \times 1$  Monkhorst-Pack k-point sampling for primitive cells. To improve the calculation accuracy, the value of parameter EDIFF was set to  $10^{-5}$  eV. The relaxation was stopped when the norms of all the forces are smaller than 0.02 eV/Å.

According to the OER mechanism proposed by Nørskov,<sup>2</sup> the reaction is a four-electron transfer process and each elemental step of the process is listed in equations (1) to (4), which involve the adsorption and desorption of reaction intermediates (such as \*OH, \*O, and \*OOH) on the active sites of catalyst surface (denoted with \*).

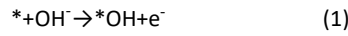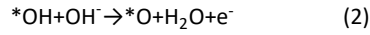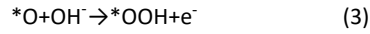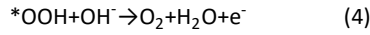

The Gibbs free energy of the four elemental steps can be calculated according to the following reduced equation (5) to (8). Where  $\mu$  represents the chemical potential of the specified species, which can be calculated by DFT.  $U_{RHE}$  is the potential of the electrode relative to the RHE, where the value of  $U_{RHE}$  is chosen as 0 or 1.23 V.

$$\Delta G_1 = \mu_{*OH} - \mu_* - \mu_{H_2O(l)} + \frac{1}{2} \mu_{H_2(g)} - eU_{RHE} \quad (5)$$

$$\Delta G_2 = \mu_{*O} - \mu_{*OH} - \mu_{H_2O(l)} + \frac{1}{2} \mu_{H_2(g)} - eU_{RHE} \quad (6)$$

$$\Delta G_3 = \mu_{*OOH} - \mu_{*O} - \mu_{H_2O(l)} + \frac{1}{2} \mu_{H_2(g)} - eU_{RHE} \quad (7)$$

$$\Delta G_4 = \mu_* - \mu_{*OOH} + \mu_{O_2(g)} + \frac{1}{2} \mu_{H_2(g)} - eU_{RHE} \quad (8)$$

The theoretical overpotential can be calculated by the following equation.

$$\eta = \frac{\max[\Delta G_1, \Delta G_2, \Delta G_3, \Delta G_4]}{e} - 1.23V \quad (9)$$

## TOF calculation

TOF is calculated according to the following formula:

$$TOF = \frac{\text{number of total oxygen turnovers} / \text{cm}^2}{\text{number of active sites} / \text{cm}^2}$$

Firstly, the electrochemical surface area ( $A_{ECSA}$ ) was calculated according to the following equation:

$$A_{ECSA} = \frac{\text{specific capacitance}}{40 \mu F \text{ cm}^{-2} \text{ per cm}^2_{ECSA}}, \text{ where specific capacitance is } C_{dl} \text{ calculated from CV cures, and } 40 \mu F \text{ is a constant to}$$

convert capacitance to  $A_{ECSA}$ .

$$\text{Then, number of } O_2 = \left( j \frac{\text{mA}}{\text{cm}^2} \right) \left( \frac{1 \text{ C s}^{-1}}{1000 \text{ mA}} \right) \left( \frac{1 \text{ mol e}^-}{96485.3 \text{ C}} \right) \left( \frac{1 \text{ mol } O_2}{4 \text{ mol e}^-} \right) \left( \frac{6.022 \times 10^{23} \text{ molecules}}{1 \text{ mol } O_2} \right)$$

$$= 1.56 \times 10^{15} \frac{O_2/s}{\text{cm}^2} \text{ per } \frac{\text{mA}}{\text{cm}^2}$$

$$\text{Number of active sites} = \left( \frac{\text{number of atoms/unit cell}}{\text{volume/unit cell}} \right)^{\frac{2}{3}}$$

Finally, the TOF plot was drawn according to the following equation:

$$\text{TOF} = \frac{(1.56 \times 10^{15} \frac{\text{O}_2/\text{s}}{\text{cm}^{-2}} \text{ per } \frac{\text{mA}}{\text{cm}^{-2}}) \times |j|}{\text{number of active sites} \times A_{\text{ECSA}}}$$

### Mass activity calculation

The Mass activity was calculated according to the following formulas:

$$\text{Mass activity} = \frac{j \times A}{m}$$

Where  $j$  ( $\text{A cm}^{-2}$ ) was the measured current density at  $\eta=270$  mV,  $A$  ( $\text{cm}^2$ ) was the geometric area of the work electrode and  $m$  (g) referred to the total metal loading obtained by ICP-OES.

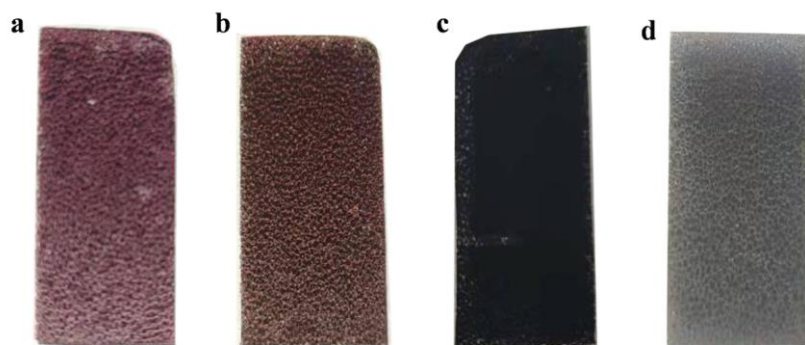

**Fig. S1.** The photos of different samples. (a)  $\text{Co}(\text{OH})_2@NF$ . (b)  $\text{V-Co}(\text{OH})_2@NF$ . (c)  $\text{V-Co}_4\text{N}@NF$ . (d)  $\text{NiFe LDH/V-Co}_4\text{N}@NF$ .

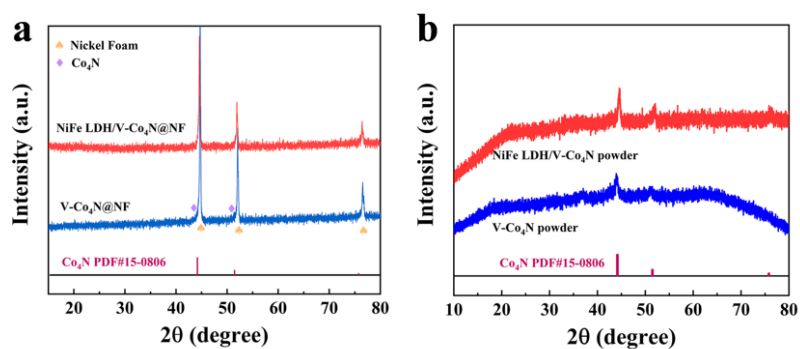

**Fig. S2.** XRD pattern of samples. (a)  $\text{V-Co}_4\text{N}@NF$  and  $\text{NiFe LDH/V-Co}_4\text{N}@NF$ . (b)  $\text{V-Co}_4\text{N}$  and  $\text{NiFe LDH/V-Co}_4\text{N}$  powder.

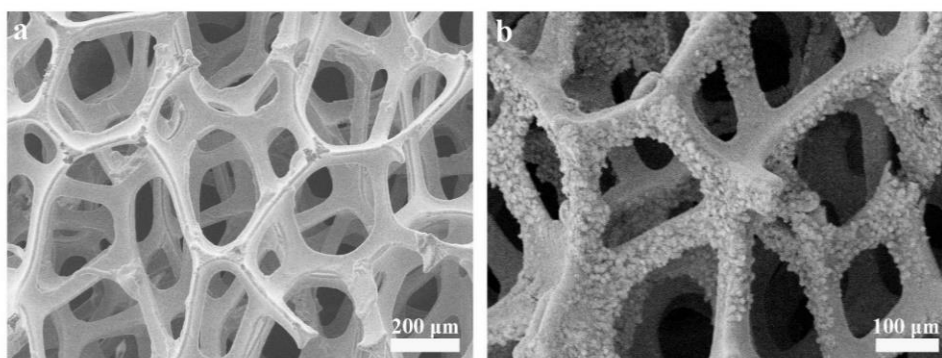

**Fig. S3.** SEM images. (a) Nickel foam substrate (NF). (b)  $\text{V-Co}(\text{OH})_2@NF$ .

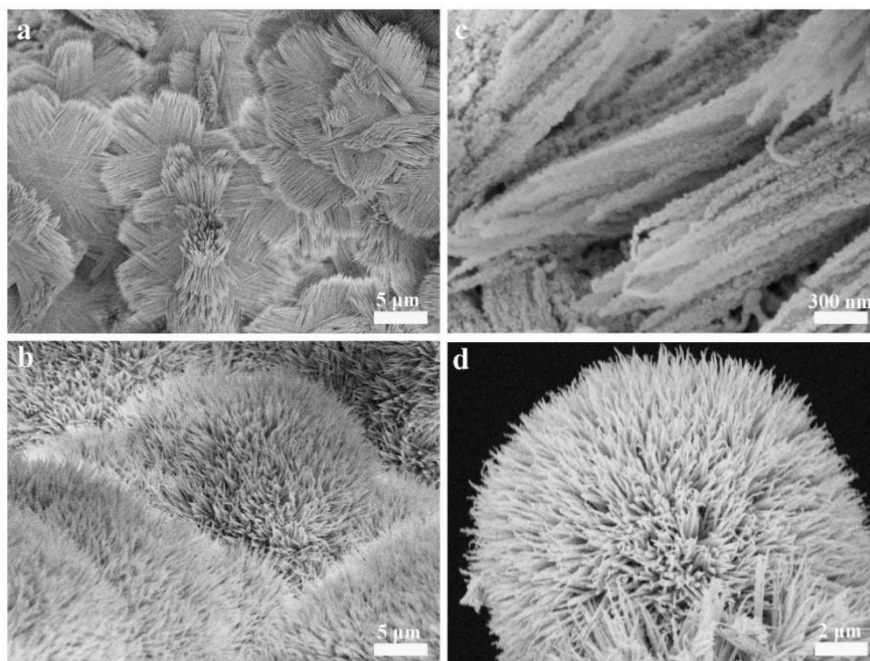

**Fig. S4.** SEM images. (a)  $\text{Co(OH)}_2\text{@NF}$ . (b)  $\text{V-Co(OH)}_2\text{@NF}$ . (c)  $\text{Co}_4\text{N@NF}$ . (d)  $\text{V-Co}_4\text{N@NF}$ .

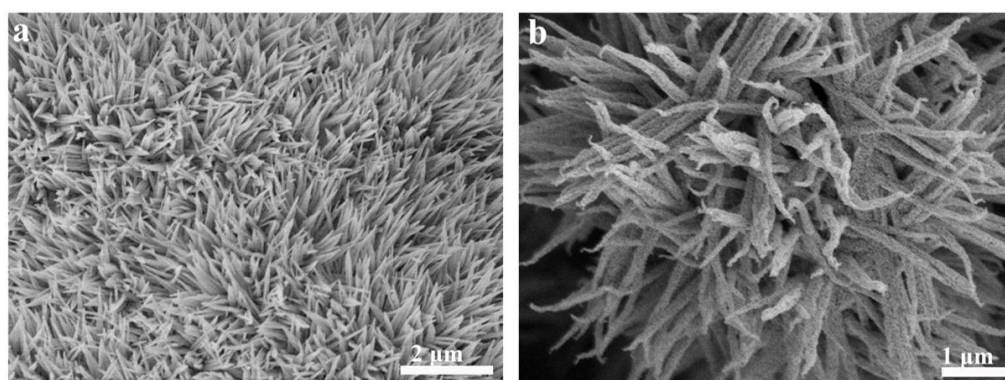

**Fig. S5.** SEM images. (a)  $\text{V-Co(OH)}_2\text{@NF}$ . (b)  $\text{V-Co}_4\text{N@NF}$ .

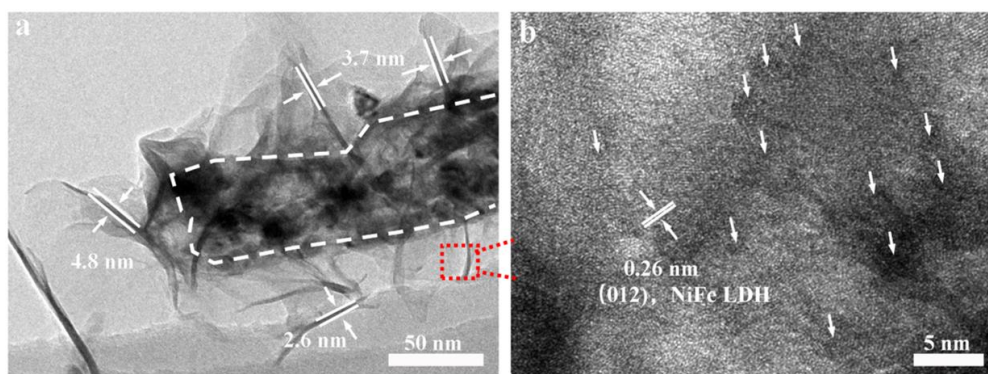

**Fig. S6.** TEM images. (a)  $\text{NiFe LDH/V-Co}_4\text{N}$ . (b) HRTEM image of  $\text{NiFe LDH/V-Co}_4\text{N}$  taken from the red square in the image on the left.

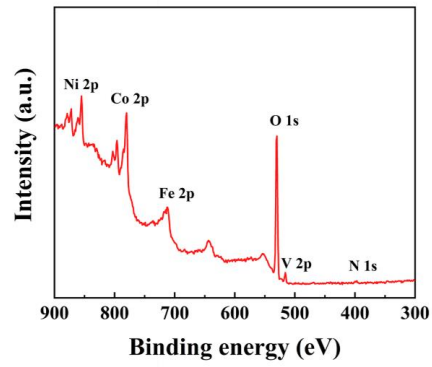

Fig. S7. XPS survey spectra of NiFe LDH/V-Co<sub>4</sub>N.

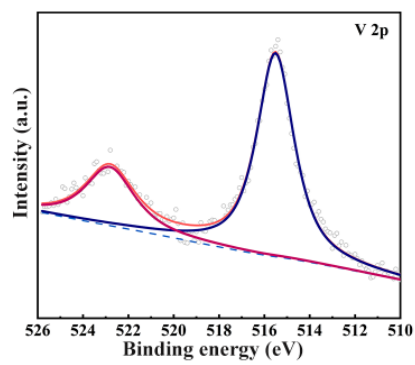

Fig. S8. (a) V 2p XPS spectra of V-Co<sub>4</sub>N.

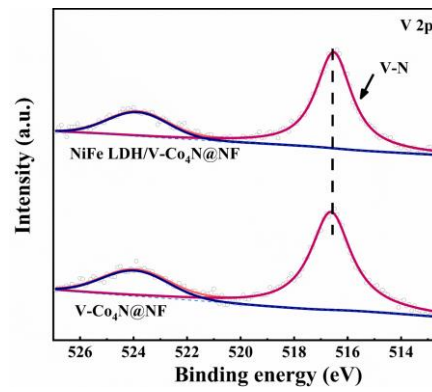

Fig. S9. V 2p XPS spectra before and after heterointerface formation.



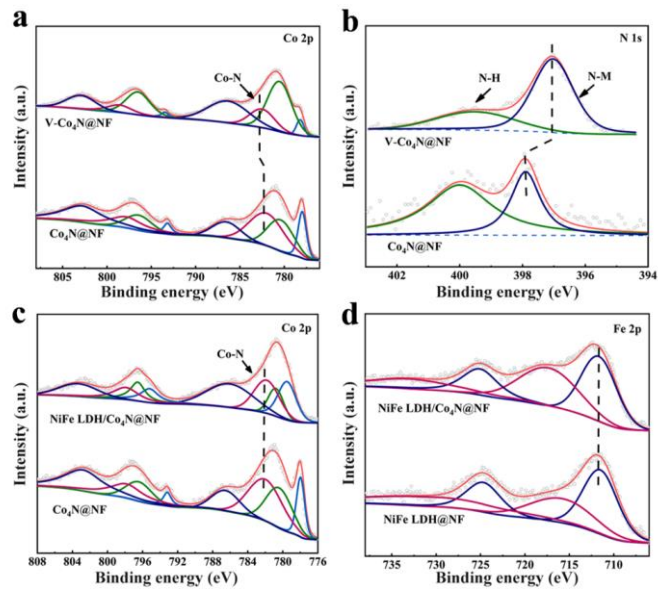

**Fig. S10.** Structural characterization. (a) Co 2p of Co<sub>4</sub>N and V-Co<sub>4</sub>N. (b) N 1s of Co<sub>4</sub>N and V-Co<sub>4</sub>N. (c) Co 2p of Co<sub>4</sub>N and NiFe LDH/Co<sub>4</sub>N. (d) Fe 2p of NiFe LDH and NiFe LDH/Co<sub>4</sub>N.

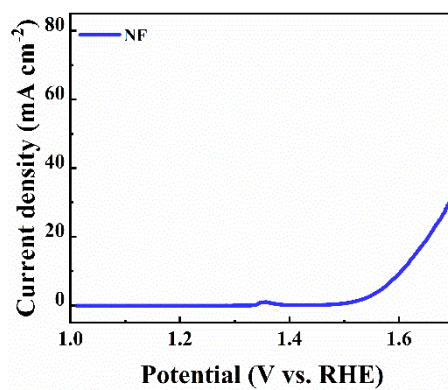

**Fig. S11.** LSV curve of pure nickel foam.

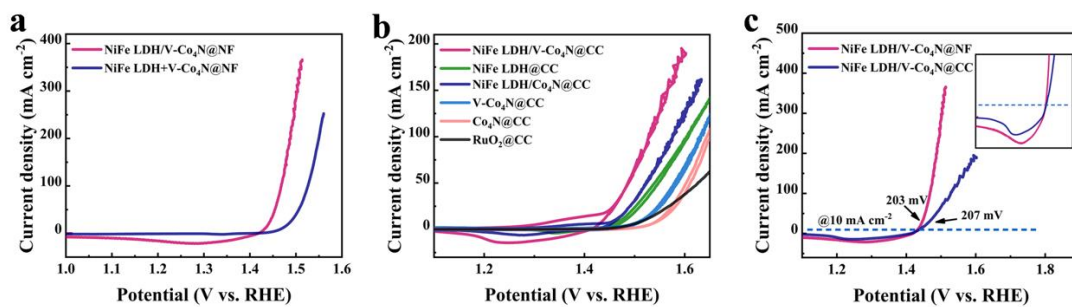

**Fig. S12.** (a) The anodic polarization curves of NiFe LDH/V-Co<sub>4</sub>N@NF and NiFe LDH+V-Co<sub>4</sub>N@NF. (b) The anodic polarization curves of catalysts loaded carbon cloth. (c) The comparison of overpotential at 10 mA cm<sup>-2</sup> between NiFe LDH/V-Co<sub>4</sub>N@NF and NiFe LDH/V-Co<sub>4</sub>N@CC.



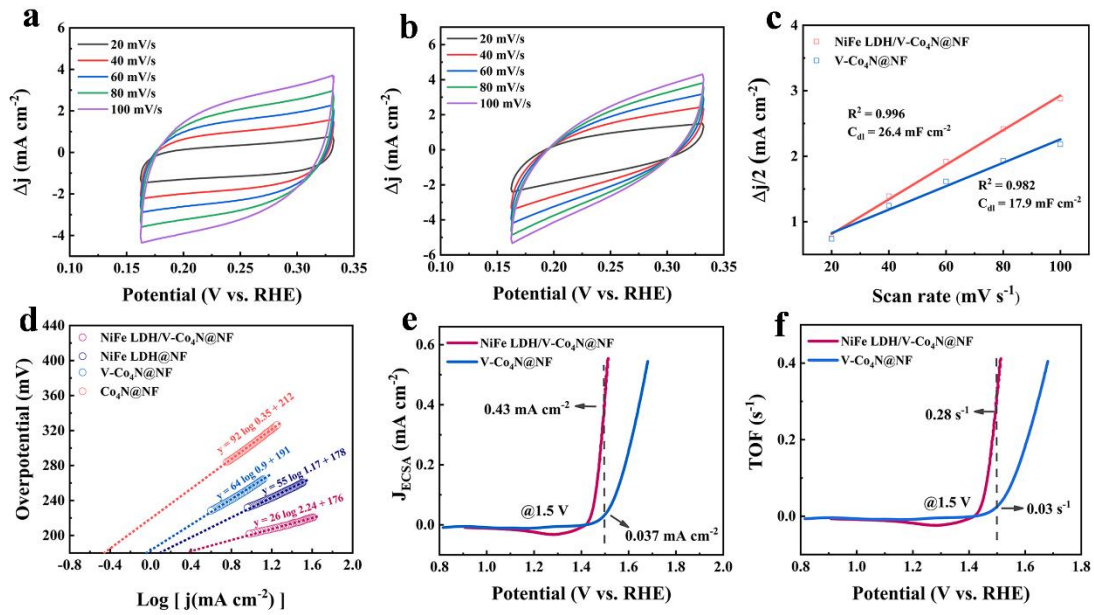

**Fig. S13.** (a) and (b) CV curves of NiFe LDH/V-Co<sub>4</sub>N and V-Co<sub>4</sub>N at different scan rates. (c) Calculated double-layer capacitance of different catalysts from CV curves. (d) Exchange current densities values derived from the Tafel plot. (e) ECSA normalized polarization curves of the NiFe LDH/V-Co<sub>4</sub>N and V-Co<sub>4</sub>N catalysts. (f) Turnover frequency (TOF) curves of the NiFe LDH/V-Co<sub>4</sub>N and V-Co<sub>4</sub>N catalysts. The number of total O<sub>2</sub> turnovers and active sites was calculated according to the references.<sup>3-5</sup>

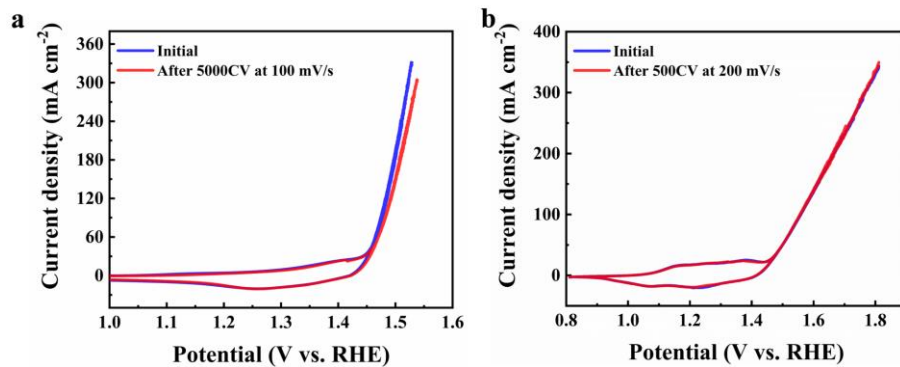

**Fig. S14.** Polarization curves of NiFe LDH/V-Co<sub>4</sub>N@NF before and after dynamic stability test. (a) 5000 cycles CV test at the scan rate of 100 mV s<sup>-1</sup>. (b) 500 cycles CV test at a scan rate of 200 mV s<sup>-1</sup>.

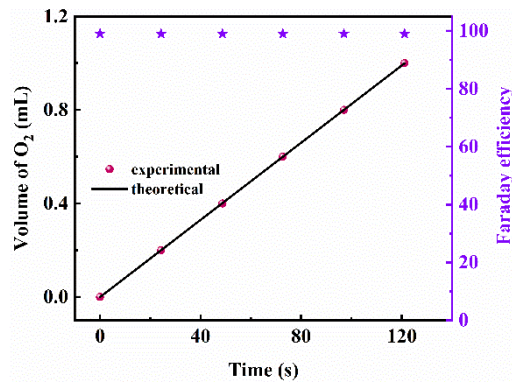

**Fig. S15.** The evaluation of Faradic efficiency for NiFe LDH/V-Co<sub>4</sub>N@NF.

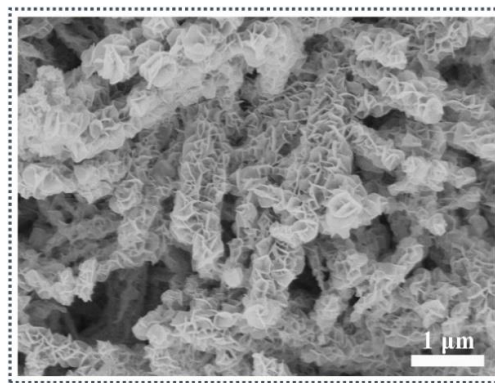

**Fig. S16.** SEM image of NiFe LDH/V-Co<sub>4</sub>N@NF catalyst after OER test.

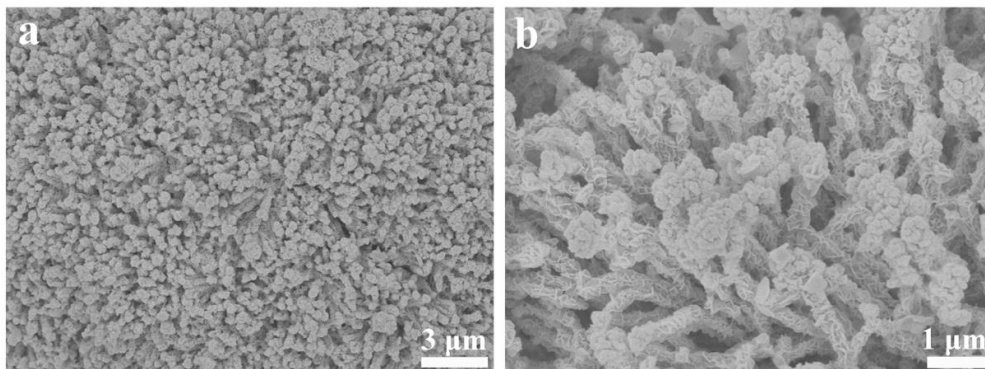

**Fig. S17.** SEM images of NiFe LDH/V-Co<sub>4</sub>N@NF after 24 h stability test.

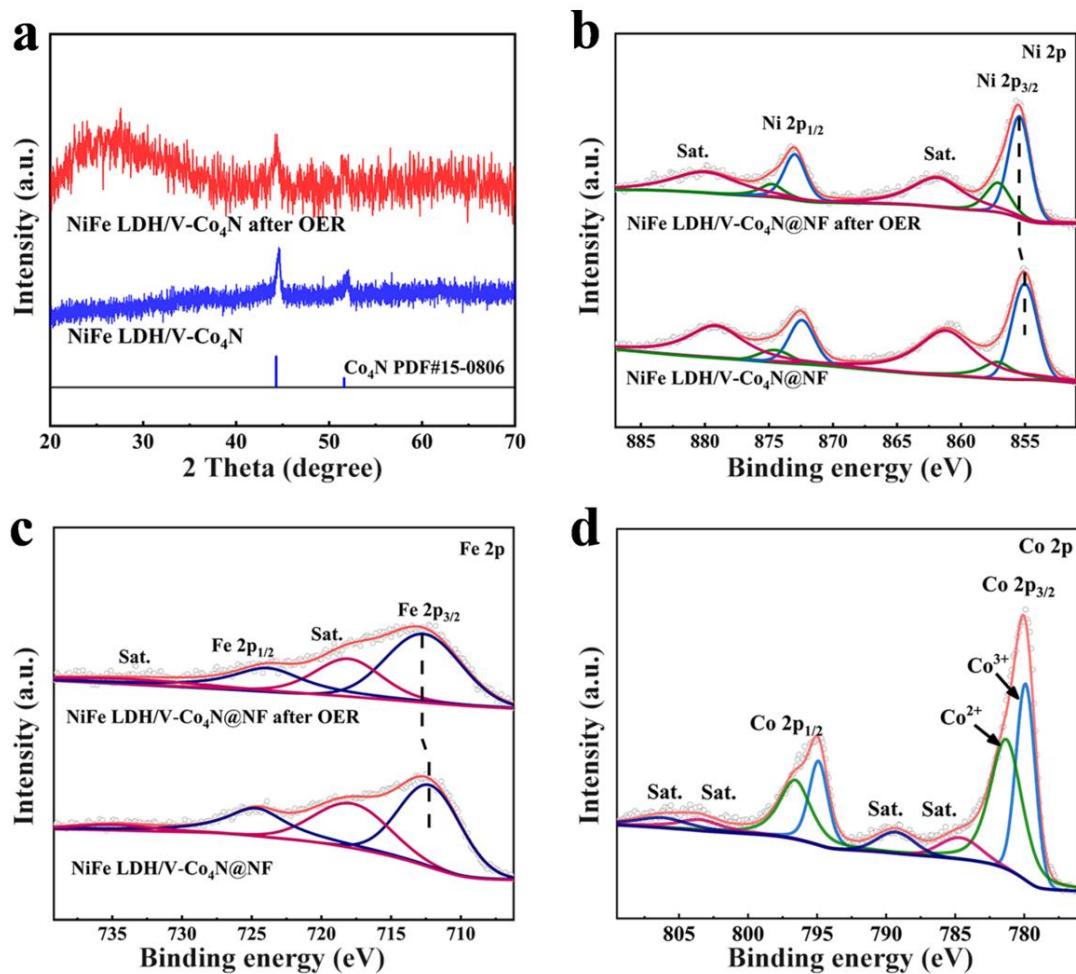

**Fig. S18.** Characterization of the catalyst after 24 h stability test. (a) XRD pattern without NF. (b) Ni 2p XPS of NiFe LDH/V-Co<sub>4</sub>N before and after stability test. (c) Fe 2p XPS of NiFe LDH/V-Co<sub>4</sub>N before and after stability test. (d) Co 2p XPS after stability test.

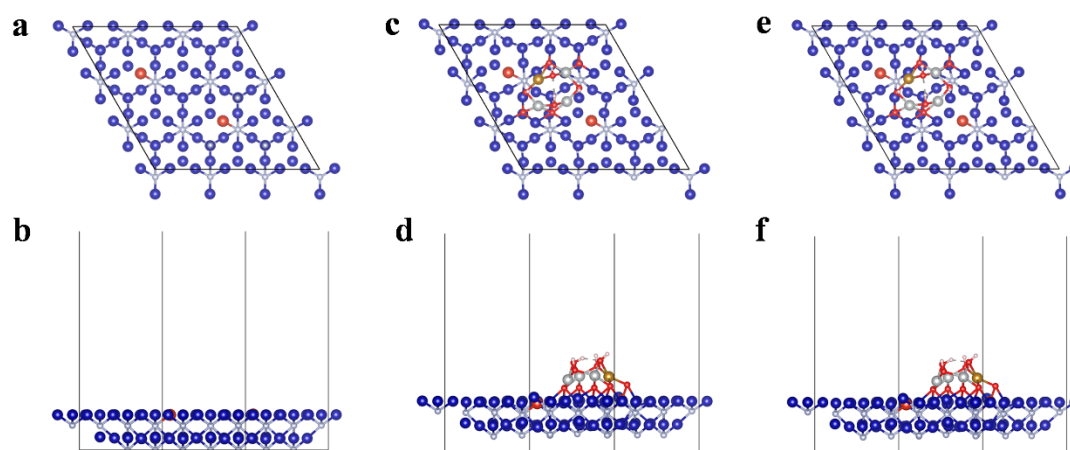

**Fig. S19.** Structural models. (a) and (b) optimized V-Co<sub>4</sub>N. (c) and (d) NiFe LDH/V-Co<sub>4</sub>N before optimization. (e) and (f) NiFe LDH/V-Co<sub>4</sub>N after optimization. The blue ball represents the Co atom, the brown ball represents the Fe atom, the small red ball represents the O atom, the small pink ball represents the H atom, the big gray ball represents Ni atoms, the small gray ball represents N atoms and the large red ball represents the V atom.

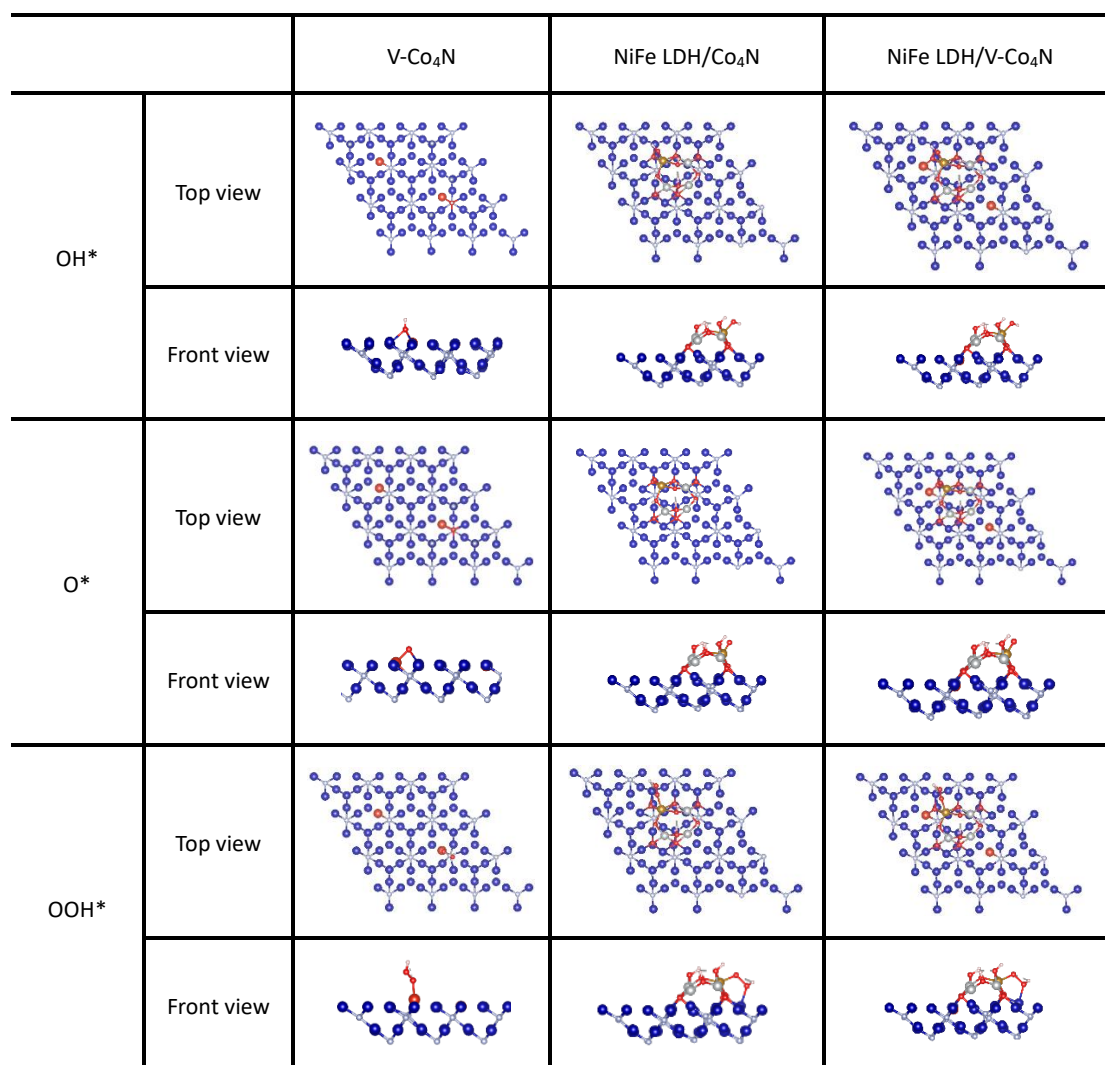

**Fig. S20.** Geometric adsorption configurations of oxygenated intermediates (\*OH, \*O, and \*OOH) on active site V-Co<sub>4</sub>N (Co site), NiFe LDH/Co<sub>4</sub>N (Fe site), and NiFe LDH/V-Co<sub>4</sub>N (Fe site) electrocatalyst surface from different views.

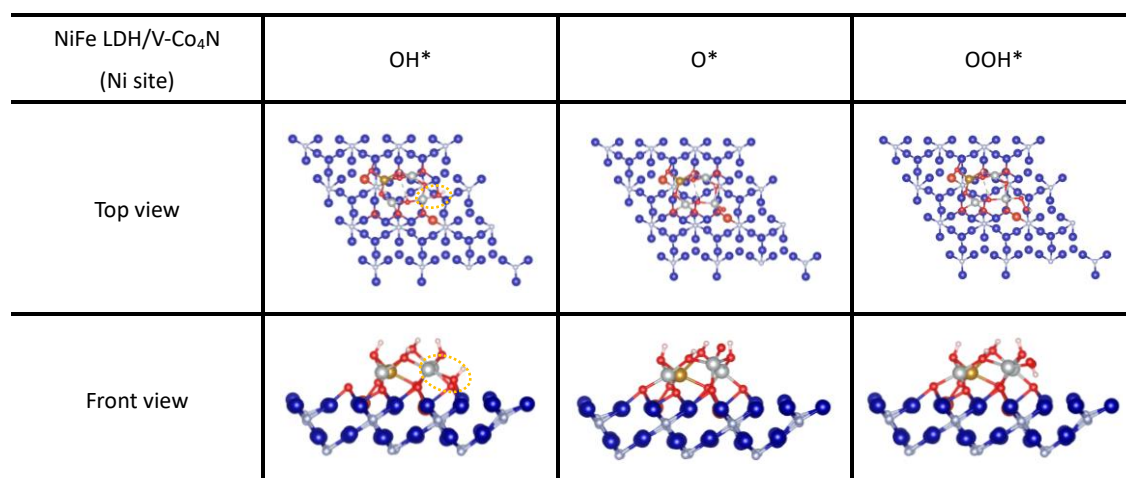

**Fig. S21.** Geometric adsorption configurations of oxygenated intermediates (\*OH, \*O, and \*OOH) at Ni site of NiFe LDH/V-Co<sub>4</sub>N.

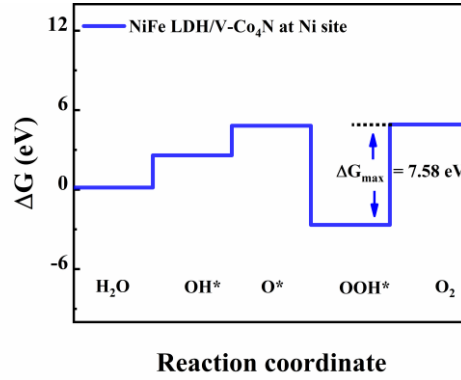

Fig. S22. Gibbs free energy diagram for the four steps of OER at Ni site of NiFe LDH/Co<sub>4</sub>N.

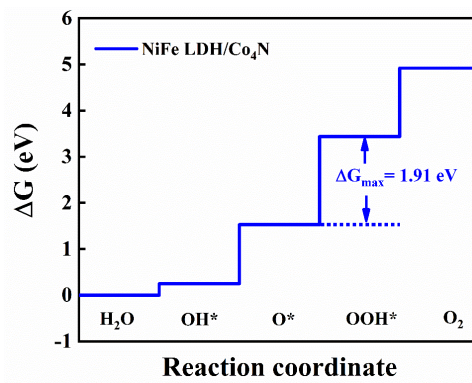

Fig. S23. Gibbs free energy diagram for the four steps of OER on NiFe LDH/Co<sub>4</sub>N.

The rate-determining step for the NiFe LDH/Co<sub>4</sub>N catalyst is also the third step, and the calculated overpotential is 0.68 V. The value of the overpotential is between that of Co<sub>4</sub>N and NiFe LDH/V-Co<sub>4</sub>N, which is consistent with the trend of the overpotential obtained from electrochemical experimental tests. This indicates that the interfacial interaction between NiFe LDH and Co<sub>4</sub>N is non-competitive compared to that between NiFe LDH and V-Co<sub>4</sub>N.

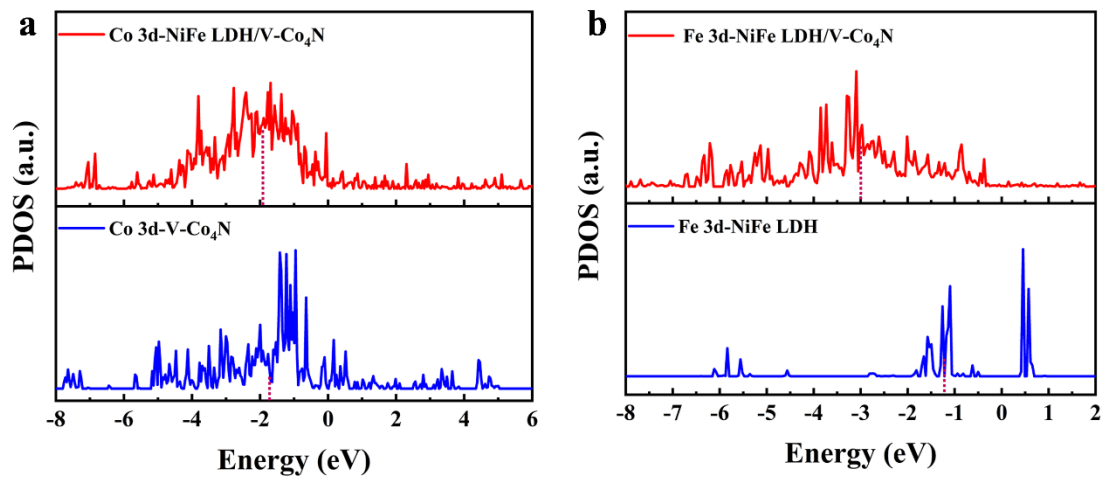

Fig. S24. Local density of states of surface-specific atoms. (a) Co d orbitals of NiFe LDH/V-Co<sub>4</sub>N and V-Co<sub>4</sub>N. (b) Fe d orbitals of NiFe LDH/V-Co<sub>4</sub>N and NiFe LDH. The dotted line represents the position of the d-band center.

The change in the d-band center levels of the surface Co and Fe atoms indicates the existence of electronic coupling effects at the interface after compositing.



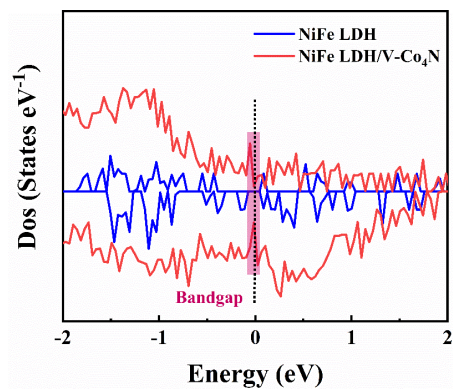

**Fig. S25.** Total density of states curves of NiFe LDH/V-Co<sub>4</sub>N and NiFe LDH. Fermi-level is set to zero.

**Table S1** The metal loading of fresh NiFe LDH/V-Co<sub>4</sub>N on NF.

| elements                             | V     | Fe    | Co     | Ni     |
|--------------------------------------|-------|-------|--------|--------|
| loading amount W (%)                 | 2.56% | 1.15% | 30.80% | 40.87% |
| loading amount (mg/cm <sup>2</sup> ) | 0.13  | 0.06  | 1.54   | 2.04   |

**Table S2** Comparison of OER performance for the samples of this work and reported catalysts ( $\eta_{10}$ -overpotential at 10 mA cm<sup>-2</sup> with *iR* correction,  $\eta_{100}$ -overpotential at 100 mA cm<sup>-2</sup> with *iR* correction).

| Catalysts                                    | Electrolyte                         | $\eta_{10}$<br>(mV) | $\eta_{100}$<br>(mV) | Tafel slope<br>(mV dec <sup>-1</sup> ) | Ref.      |
|----------------------------------------------|-------------------------------------|---------------------|----------------------|----------------------------------------|-----------|
| NiFe LDH/V-Co <sub>4</sub> N@NF              | 1 M KOH                             | 203                 | 240                  | 26.0                                   | This work |
| Ni <sub>3</sub> N-NiMoN/CC                   | 1 M KOH                             | 277                 | /                    | 67                                     | 6         |
| FeCo-Co <sub>4</sub> N/N-C                   | 1 M KOH                             | 280                 | /                    | 40                                     | 7         |
| Ni <sub>2</sub> Mo <sub>3</sub> N            | 0.1 M KOH                           | 270                 | /                    | 59                                     | 8         |
| Co <sub>4</sub> N <sub>0.82</sub> nanosheets | 1 M KOH                             | 190                 | /                    | 84                                     | 9         |
| CoO <sub>x</sub> @CoN <sub>y</sub> /NCNF     | 1 M KOH                             | 460                 | /                    | 85.6                                   | 10        |
| CoVFeN@NF                                    | 1 M KOH                             | 212                 | /                    | 34.8                                   | 11        |
| NiMoN@NiFeN                                  | 1 M KOH                             | /                   | 277                  | 58.6                                   | 12        |
| CoFe-NA/NF                                   | 1 M KOH                             | /                   | 250                  | 69.9                                   | 13        |
| Co <sub>4</sub> N-CeO <sub>2</sub> /GP       | 1 M KOH                             | 239                 | /                    | 37.1                                   | 14        |
| CoNiN@NiFe LDH                               | 1 M KOH                             | 227                 | /                    | 73.6                                   | 15        |
| CoSAs-MoS <sub>2</sub> /TiN                  | 1 M KOH                             | 340                 | /                    | 81.2                                   | 16        |
| (N, S)-RGO@CoN                               | 1 M Na <sub>2</sub> SO <sub>4</sub> | 220                 | /                    | 33                                     | 17        |
| TiN@Co <sub>5.47</sub> N                     | 1 M KOH                             | 211                 | /                    | 42.5                                   | 18        |
| WN-Ni(OH) <sub>2</sub>                       | 1 M KOH                             | /                   | 339                  | 96.5                                   | 19        |
| FeOOH/Ni <sub>3</sub> N                      | 1 M KOH                             | 244                 | /                    | 64                                     | 20        |
| Co <sub>4</sub> N NW/CC                      | 1 M KOH                             | 257                 | /                    | 44                                     | 21        |



**Table S3** Comparison of OER performance between this work and NiFe LDH-based catalysts ( $\eta_{10}$ -overpotential at 10 mA cm<sup>-2</sup>).

| Catalysts                       | Electrolyte | $\eta_{10}$<br>(mV) | Tafel slope<br>(mV dec <sup>-1</sup> ) | Ref.      |
|---------------------------------|-------------|---------------------|----------------------------------------|-----------|
| NiFe LDH/V-Co <sub>4</sub> N@NF | 1 M KOH     | 203                 | 26.0                                   | This work |
| PM-NiFe LDH                     | 1 M KOH     | 230                 | 47                                     | 22        |
| NiFe LDH-NS@DG10                | 1 M KOH     | 210                 | 52                                     | 23        |
| Ru-NiFe LDH                     | 1 M KOH     | 246                 | 67.2                                   | 24        |
| IrO <sub>x</sub> /U-NiFe LDH    | 1 M KOH     | 236                 | 74.3                                   | 25        |
| CeO <sub>2-x</sub> /NiFe LDH    | 1 M KOH     | 216                 | 74.1                                   | 26        |
| Co@NiFe LDH                     | 1 M KOH     | 253                 | 44                                     | 27        |
| NiFe LDH                        | 1 M KOH     | 247                 | 37                                     | 28        |
| NiFeCo LDH/CF                   | 1 M KOH     | 249                 | 42                                     | 29        |
| (EE)NiFe-LDH<br>nanosheets      | 1 M KOH     | 205                 | 50.8                                   | 30        |
| CoO@NiFe LDH/NF                 | 1 M KOH     | 210                 | 83                                     | 31        |
| Co-C@NiFe LDH                   | 1 M KOH     | 249                 | 57.9                                   | 32        |
| Ultrathin NiFe LDH              | 1 M KOH     | 210                 | 31                                     | 33        |
| F-NiFe LDH                      | 1 M KOH     | 243                 | 50                                     | 34        |
| LDH-Bir                         | 1 M KOH     | 258                 | 43                                     | 35        |

**Table S4** The comparison of NiFe LDH/V-Co<sub>4</sub>N@NF with commercial catalyst RuO<sub>2</sub> at overpotential of 270 mV.

| catalysts                                   | Mass activity<br>(A g <sup>-1</sup> ) | Surface activity<br>(mA cm <sup>-2</sup> ) | Turnover frequency<br>(s <sup>-1</sup> ) |
|---------------------------------------------|---------------------------------------|--------------------------------------------|------------------------------------------|
| NiFe LDH/V-Co <sub>4</sub> N@NF (This work) | 78                                    | 282.6                                      | 0.7                                      |
| RuO <sub>2</sub>                            | 6.8                                   | 5.4                                        | 0.4                                      |

**Table S5** The composition of the element and catalyst loading amount after stability test.

| elements             | V     | Fe    | Co     | Ni     |
|----------------------|-------|-------|--------|--------|
| loading amount W (%) | 1.66% | 3.65% | 35.34% | 24.63% |

**Table S6** Gibbs free energy of the intermediate reactions at each step of the OER process and theoretically calculated overpotentials for V-Co<sub>4</sub>N, NiFe LDH/Co<sub>4</sub>N, and NiFe LDH/V-Co<sub>4</sub>N.

| Samples                      | $\Delta G_I$ | $\Delta G_{II}$ | $\Delta G_{III}$ | $\Delta G_{IV}$ | Overpotential (V) |
|------------------------------|--------------|-----------------|------------------|-----------------|-------------------|
| V-Co <sub>4</sub> N          | 0.24         | 0.35            | 2.93             | 1.40            | 1.70              |
| NiFe LDH/Co <sub>4</sub> N   | 0.25         | 1.28            | 1.91             | 1.48            | 0.68              |
| NiFe LDH/V-Co <sub>4</sub> N | 0.19         | 1.48            | 1.82             | 1.43            | 0.59              |

**Table S7** The d-band center ( $\epsilon_d$ ) levels of the surface atoms in the different structures, where VCN represents V-Co<sub>4</sub>N, LVCN represents NiFe LDH/V-Co<sub>4</sub>N.

| Structures                        | Co 3d-VCN | Fe 3d-LDH | Co 3d-LVCN | Fe 3d-LVCN |
|-----------------------------------|-----------|-----------|------------|------------|
| d-band center ( $\epsilon_d$ )/eV | -1.749    | -1.224    | -1.939     | -3.024     |

## References

- 1 X. Xu, F. Song and X. Hu, *Nat. Commun.*, 2016, **7**, 12324.
- 2 I. C. Man, H. Y. Su, F. Calle - Vallejo, H. A. Hansen, J. I. Martínez, N. G. Inoglu, J. Kitchin, T. F. Jaramillo, J. K. Nørskov and J. Rossmeisl, *ChemCatChem*, 2011, **3**, 1159-1165.
- 3 Z. Chen, Y. Song, J. Cai, X. Zheng, D. Han, Y. Wu, Y. Zang, S. Niu, Y. Liu, J. Zhu, X. Liu and G. Wang, *Angew. Chem. Int. Ed.*, 2018, **57**, 5076-5080.
- 4 X. Yu, J. Zhao and M. Johnsson, *Adv. Funct. Mater.*, 2021, **31**, 2101578.
- 5 X.-D. Wang, Y.-F. Xu, H.-S. Rao, W.-J. Xu, H.-Y. Chen, W.-X. Zhang, D.-B. Kuang and C.-Y. Su, *Energy Environ. Sci.*, 2016, **9**, 1468-1475.
- 6 A. Wu, Y. Xie, H. Ma, C. Tian, Y. Gu, H. Yan, X. Zhang, G. Yang and H. Fu, *Nano Energy*, 2018, **44**, 353-363.
- 7 X. Zhu, T. Jin, C. Tian, C. Lu, X. Liu, M. Zeng, X. Zhuang, S. Yang, L. He, H. Liu and S. Dai, *Adv. Mater.*, 2017, **29**, 1704091.
- 8 Y. Yuan, S. Adimi, X. Guo, T. Thomas, Y. Zhu, H. Guo, G. S. Priyanga, P. Yoo, J. Wang, J. Chen, P. Liao, J. P. Attfield and M. Yang, *Angew. Chem. Int. Ed.*, 2020, **59**, 18036-18041.
- 9 H. Liu, J. Lei, S. Yang, F. Qin, L. Cui, Y. Kong, X. Zheng, T. Duan, W. Zhu and R. He, *Appl. Catal. B: Environ.*, 2021, **286**, 119894.
- 10 K. R. Yoon, C. K. Hwang, S. H. Kim, J. W. Jung, J. E. Chae, J. Kim, K. A. Lee, A. Lim, S. H. Cho, J. P. Singh, J. M. Kim, K. Shin, B. M. Moon, H. S. Park, H. J. Kim, K. H. Chae, H. C. Ham, I. D. Kim and J. Y. Kim, *ACS Nano*, 2021, **15**, 11218-11230.
- 11 D. Liu, H. Ai, J. Li, M. Fang, M. Chen, D. Liu, X. Du, P. Zhou, F. Li, K. H. Lo, Y. Tang, S. Chen, L. Wang, G. Xing and H. Pan, *Adv. Energy Mater.*, 2020, **10**, 2002464.
- 12 L. Yu, Q. Zhu, S. Song, B. McElhenny, D. Wang, C. Wu, Z. Qin, J. Bao, Y. Yu, S. Chen and Z. Ren, *Nat. Commun.*, 2019, **10**, 5106.
- 13 M. Chen, D. Liu, B. Zi, Y. Chen, D. Liu, X. Du, F. Li, P. Zhou, Y. Ke, J. Li, K. H. Lo, C. T. Kwok, W. F. Ip, S. Chen, S. Wang, Q. Liu and H. Pan, *J. Energy Chem.*, 2022, **65**, 405-414.
- 14 H. Sun, C. Tian, G. Fan, J. Qi, Z. Liu, Z. Yan, F. Cheng, J. Chen, C. P. Li and M. Du, *Adv. Funct. Mater.*, 2020, **30**, 1910596.
- 15 J. Wang, G. Lv and C. Wang, *Appl. Surf. Sci.*, 2021, **570**, 151182.
- 16 T. L. L. Doan, D. C. Nguyen, S. Prabhakaran, D. H. Kim, D. T. Tran, N. H. Kim and J. H. Lee, *Adv. Funct. Mater.*, 2021, **31**, 2100233.
- 17 D. Guo, Z. Zeng, Z. Wan, Y. Li, B. Xi and C. Wang, *Adv. Funct. Mater.*, 2021, **31**, 2101324.
- 18 D. Guo, Z. Wan, Y. Li, B. Xi and C. Wang, *Adv. Funct. Mater.*, 2020, **31**, 2008511.
- 19 C. Lv, X. Wang, L. Gao, A. Wang, S. Wang, R. Wang, X. Ning, Y. Li, D. W. Boukhvalov, Z. Huang and C. Zhang, *ACS Catal.*, 2020, **10**, 13323-13333.
- 20 J. Guan, C. Li, J. Zhao, Y. Yang, W. Zhou, Y. Wang and G.-R. Li, *Appl. Catal. B: Environ.*, 2020, **269**, 118600.
- 21 P. Chen, K. Xu, Z. Fang, Y. Tong, J. Wu, X. Lu, X. Peng, H. Ding, C. Wu and Y. Xie, *Angew. Chem. Int. Ed.*, 2015, **54**, 14710-14714.
- 22 X. Zhang, Y. Zhao, Y. Zhao, R. Shi, G. I. N. Waterhouse and T. Zhang, *Adv. Energy Mater.*, 2019, **9**, 1900881.
- 23 Y. Jia, L. Zhang, G. Gao, H. Chen, B. Wang, J. Zhou, M. T. Soo, M. Hong, X. Yan, G. Qian, J. Zou, A. Du and X. Yao, *Adv. Mater.*, 2017, **29**, 1700017.
- 24 Y. Yang, W.-J. Wang, Y.-B. Yang, P.-F. Guo, B. Zhu, K. Wang, W.-T. Wang, Z.-H. He and Z.-T. Liu, *J. Electrochem. Soc.*, 2022, **169**, 024503.
- 25 D. Liu, Y. Du, T. Li, H. Zhang, D. Liu, W. Zhang, H. Tang, Y. Hou, J. Li, S. Yan, T. Yu and Z. Zou, *Chem. Commun.*, 2020, **56**, 11465-11468.

- 26 Y. Du, D. Liu, T. Li, Y. Yan, Y. Liang, S. Yan and Z. Zou, *Appl. Catal. B: Environ.*, 2022, **306**, 121146.
- 27 S. Liu, R. Wan, Z. Lin, Z. Liu, Y. Liu, Y. Tian, D.-D. Qin and Z. Tang, *J. Mater. Chem. A*, 2022, **10**, 5244-5254.
- 28 H. Koshikawa, H. Murase, T. Hayashi, K. Nakajima, H. Mashiko, S. Shiraishi and Y. Tsuji, *ACS Catal.*, 2020, **10**, 1886-1893.
- 29 Y. Lin, H. Wang, C. K. Peng, L. Bu, C. L. Chiang, K. Tian, Y. Zhao, J. Zhao, Y. G. Lin, J. M. Lee and L. Gao, *Small*, 2020, **16**, 2002426.
- 30 B. Wang, X. Han, C. Guo, J. Jing, C. Yang, Y. Li, A. Han, D. Wang and J. Liu, *Appl. Catal. B: Environ.*, 2021, **298**, 120580.
- 31 Z. Wang, J. Zhang, Q. Yu, H. Yang, X. Chen, X. Yuan, K. Huang and X. Xiong, *Chem. Eng. J.*, 2021, **410**, 128366.
- 32 W. Li, S. Chen, M. Zhong, C. Wang and X. Lu, *Chem. Eng. J.*, 2021, **415**, 128879.
- 33 C. Kuai, Y. Zhang, D. Wu, D. Sokaras, L. Mu, S. Spence, D. Nordlund, F. Lin and X.-W. Du, *ACS Catal.*, 2019, **9**, 6027-6032.
- 34 C. Wu, H. Li, Z. Xia, X. Zhang, R. Deng, S. Wang and G. Sun, *ACS Catal.*, 2020, **10**, 11127-11135.
- 35 X. Long, Z. Chen, M. Ju, M. Sun, L. Jin, R. Cai, Z. Wang, L. Dong, L. Peng, B. Huang and S. Yang, *Angew. Chem. Int. Ed.*, 2021, **60**, 9699-9705.
